# Supplementary material for: Lower plasma linoleic acids as a risk factor for gout: an integrated analysis of population-based cohort and genetic data
Source: Royal Society of Chemistry journal article supplement (doi:10.1039/d4fo00987h), 2024-01-01
Supplement: d4fo00987h1.xlsx [file d4fo00987h1.xlsx]

## Sheet: PUFAs
	SNP	effect allele	other allele	chr	pos	beta	se	eaf	pval	PVE	FSTAT
1	rs10020067	A	C	4	88181491	-0.0271278	0.00408019	0.381441	2.99985e-11	0.000384221	44.2039
2	rs10455872	G	A	6	161010118	0.131843	0.00734871	0.078987	5.60015e-72	0.00279099	321.873
3	rs1047964	T	G	11	117156893	0.154268	0.0201684	0.010066	1.99986e-14	0.000508472	58.5061
4	rs10746732	A	G	9	86694759	-0.0281475	0.00483206	0.777542	5.69994e-09	0.000294962	33.9318
5	rs11429307	GT	G	5	55857025	-0.0398522	0.00505445	0.191495	3.19963e-15	0.000540258	62.1655
6	rs11644601	C	T	16	15172118	0.052633	0.00435714	0.296674	1.39991e-33	0.00126719	145.917
7	rs1168041	C	T	1	62960250	-0.036211	0.00424	0.65536	1.29987e-17	0.000633802	72.936
8	rs116843064	A	G	19	8429323	0.159327	0.0142266	0.01986	4.10015e-29	0.00108939	125.421
9	rs117733303	G	A	6	160922870	0.201764	0.0147022	0.018512	7.39946e-43	0.0016349	188.328
10	rs1180384	C	T	1	39892774	-0.0256419	0.00431269	0.302451	2.80001e-09	0.000307291	35.3506
11	rs12212146	C	T	6	161125454	-0.0576534	0.00776188	0.07432	1.10002e-13	0.000479498	55.1707
12	rs12419462	A	G	11	27623309	-0.0306279	0.0047212	0.228758	8.69961e-11	0.000365806	42.0845
13	rs1260326	C	T	2	27730940	0.0904386	0.00405137	0.604008	2.19786e-110	0.00431425	498.306
14	rs13389219	T	C	2	165528876	0.0354489	0.00405997	0.392574	2.49977e-18	0.000662448	76.2346
15	rs139974673	C	T	15	44027885	-0.102576	0.0125072	0.025916	2.39994e-16	0.000584517	67.2611
16	rs141469619	G	A	11	116714293	-0.179238	0.0209441	0.010139	1.10002e-17	0.000636414	73.2368
17	rs149402055	T	C	11	68525539	-0.0931948	0.014958	0.019716	4.70002e-10	0.000337419	38.8176
18	rs174564	G	A	11	61588305	-0.121598	0.00415415	0.347009	2.39883e-188	0.00739511	856.803
19	rs182549	T	C	2	136616754	-0.0271731	0.00448263	0.738671	1.29999e-09	0.000319414	36.7456
20	rs2035816	G	A	4	100508556	0.0395074	0.00715195	0.084302	3.29997e-08	0.00026526	30.5141
21	rs2302263	T	C	11	64021821	-0.039263	0.00701116	0.088121	2.1e-08	0.000272614	31.3603
22	rs261290	C	T	15	58678720	0.0280914	0.00418134	0.654648	1.80011e-11	0.000392306	45.1345
23	rs283814	G	A	19	45389224	-0.0416285	0.00739827	0.922413	1.79999e-08	0.000275221	31.6602
24	rs2972140	C	T	2	227104111	-0.0339204	0.00414893	0.650628	2.90001e-16	0.000580867	66.8409
25	rs4871624	G	T	8	126629328	-0.0244535	0.00440683	0.28745	2.90001e-08	0.000267666	30.7909
26	rs56156922	C	T	16	56987369	0.0269447	0.00425208	0.32432	2.30001e-10	0.000349037	40.1547
27	rs6073958	C	T	20	44551855	-0.0533143	0.00497908	0.198745	9.3994e-27	0.000995946	114.652
28	rs632057	G	T	6	139834012	0.0277938	0.00410121	0.627772	1.20005e-11	0.000399188	45.9266
29	rs655720	T	C	3	136103267	-0.0282098	0.00442029	0.718817	1.7e-10	0.000354017	40.7278
30	rs673548	A	G	2	21237544	0.0428037	0.00488484	0.206089	1.9002e-18	0.000667193	76.7811
31	rs6905288	A	G	6	43758873	-0.0225343	0.00399293	0.568514	1.7e-08	0.000276862	31.8491
32	rs72836561	T	C	17	41926126	-0.0873155	0.0113592	0.031481	1.50003e-14	0.000513504	59.0853
33	rs7402939	C	T	15	99183876	-0.0236583	0.00413759	0.623528	1.09999e-08	0.000284203	32.6937
34	rs752446	A	G	8	10649767	-0.0259432	0.00409605	0.375217	2.39999e-10	0.000348694	40.1152
35	rs78058190	A	G	2	219699999	-0.0623769	0.010261	0.050111	1.2e-09	0.000321224	36.9539
36	rs7924036	T	G	10	65191645	0.0366406	0.00396562	0.504218	2.49977e-20	0.000741755	85.3681
37	rs79598313	T	C	1	27284913	-0.0818364	0.0131684	0.023212	5.1e-10	0.000335707	38.6206
38	rs9419746	T	C	10	94508055	-0.0294304	0.00490611	0.212625	2e-09	0.000312796	35.9841
39	rs9908820	G	A	17	73408819	-0.0285307	0.0044699	0.729127	1.7e-10	0.000354124	40.7401

## Sheet: MUFAs
	SNP	effect allele	other allele	chr	pos	beta	se	eaf	pval	PVE	FSTAT
1	rs10455872	G	A	6	161010118	-0.129439	0.00732739	0.078987	7.8001e-70	0.00270604	312.05
2	rs1047964	T	G	11	117156893	-0.229365	0.0200834	0.010066	3.29989e-30	0.00113284	130.428
3	rs10750766	A	C	11	65473798	0.0286254	0.00434889	0.7098	4.60045e-11	0.000376584	43.325
4	rs11207994	T	C	1	63047987	-0.0554569	0.00414303	0.350968	7.29962e-41	0.00155553	179.171
5	rs11235	C	T	3	52745087	0.0236933	0.00396561	0.455563	2.30001e-09	0.000310296	35.6963
6	rs1128249	T	G	2	165528624	-0.0365782	0.00404952	0.39204	1.69981e-19	0.000708939	81.5887
7	rs11429307	GT	G	5	55857025	0.0453101	0.00504219	0.191495	2.60016e-19	0.000701659	80.7503
8	rs11644601	C	T	16	15172118	-0.0706378	0.00434554	0.296674	1.99986e-59	0.00229229	264.228
9	rs116843064	A	G	19	8429323	-0.2204	0.0141877	0.01986	1.99986e-54	0.00209396	241.319
10	rs117733303	G	A	6	160922870	-0.204486	0.0146596	0.018512	3.19963e-44	0.00168899	194.57
11	rs11940694	G	A	4	39414993	0.0232844	0.0040727	0.605096	1.09999e-08	0.000284133	32.6857
12	rs12212146	C	T	6	161125454	0.0585156	0.00773937	0.07432	4.00037e-14	0.000496816	57.1643
13	rs1260326	C	T	2	27730940	-0.0880817	0.00403978	0.604008	2.09894e-105	0.00411665	475.388
14	rs13107325	T	C	4	103188709	0.0432974	0.00753796	0.074274	9.29994e-09	0.000286795	32.992
15	rs13108218	G	A	4	3443931	-0.0305164	0.00409307	0.615408	8.9002e-14	0.000483101	55.5854
16	rs1365297	G	A	1	93858292	-0.0284374	0.00510367	0.184215	2.5e-08	0.000269884	31.0461
17	rs139110024	T	G	16	15419784	0.0688616	0.0111867	0.038881	7.49998e-10	0.000329372	37.8916
18	rs1408	A	G	4	88057353	0.0277559	0.00401263	0.5793	4.60045e-12	0.000415864	47.8459
19	rs141469619	G	A	11	116714293	0.265559	0.0208558	0.010139	3.90032e-37	0.00140778	162.129
20	rs150844304	C	A	15	43726625	0.125859	0.0125196	0.025675	8.9002e-24	0.000877982	101.06
21	rs174564	G	A	11	61588305	0.19826	0.00413666	0.347009	1e-200	0.0195822	2297.01
22	rs1801689	C	A	17	64210580	-0.0714073	0.0115046	0.03052	5.39995e-10	0.00033487	38.5243
23	rs2304128	T	G	19	19746151	-0.045341	0.00737952	0.079929	8e-10	0.000328143	37.7501
24	rs2642438	G	A	1	220970028	-0.0316508	0.00433057	0.703828	2.70023e-13	0.000464256	53.416
25	rs283814	G	A	19	45389224	0.0538255	0.00737802	0.922413	2.99985e-13	0.000462567	53.2217
26	rs2925979	C	T	16	81534790	-0.0295931	0.00431041	0.698985	6.59933e-12	0.000409681	47.1342
27	rs2972140	C	T	2	227104111	0.0371855	0.00413706	0.650628	2.49977e-19	0.000702002	80.7897
28	rs3019621	C	T	11	61807783	0.0311412	0.00473182	0.773698	4.70002e-11	0.00037647	43.3118
29	rs34634128	GT	G	3	136322265	0.0302059	0.00452682	0.740357	2.49977e-11	0.000386998	44.5235
30	rs35163364	T	C	7	128732786	-0.0238538	0.0040061	0.432061	2.59998e-09	0.000308189	35.4539
31	rs4704834	G	A	5	156443066	0.0282772	0.004127	0.644043	7.29962e-12	0.000408043	46.9458
32	rs56257534	T	C	4	171521999	-0.028794	0.00463599	0.239661	5.30005e-10	0.000335315	38.5755
33	rs563296	A	G	10	99772404	0.0243088	0.00397826	0.557519	9.90011e-10	0.000324548	37.3365
34	rs603424	A	G	10	102075479	-0.0489882	0.00520289	0.17386	4.70002e-21	0.000770262	88.6515
35	rs62117489	A	C	19	8442202	-0.0522453	0.00858963	0.056454	1.2e-09	0.000321577	36.9946
36	rs632057	G	T	6	139834012	-0.0281093	0.00408932	0.627772	6.20012e-12	0.000410676	47.2487
37	rs676210	A	G	2	21231524	-0.0750024	0.00487347	0.205781	1.9002e-53	0.00205523	236.846
38	rs67981690	G	A	12	21343886	0.0369237	0.00592957	0.129099	4.79999e-10	0.000337052	38.7754
39	rs7140110	C	T	13	114544024	0.0239699	0.0043214	0.299398	2.90001e-08	0.000267453	30.7663
40	rs72555385	G	A	7	73123473	0.0645712	0.00918104	0.049314	1.99986e-12	0.000429919	49.4637
41	rs72836561	T	C	17	41926126	0.117198	0.0113317	0.031481	4.49987e-25	0.000929236	106.965
42	rs7679	C	T	20	44576502	0.0569608	0.00509203	0.186416	4.79954e-29	0.00108687	125.13
43	rs7704383	T	C	5	78602472	0.0232397	0.00399816	0.568885	6.19998e-09	0.000293692	33.7857
44	rs7772305	G	A	6	31328886	0.0270665	0.00450704	0.257649	1.89998e-09	0.000313491	36.064
45	rs78058190	A	G	2	219699999	0.0729115	0.0102316	0.050111	1e-12	0.00044136	50.7806
46	rs7924036	T	G	10	65191645	-0.0453884	0.00395433	0.504218	1.69981e-30	0.00114426	131.746
47	rs9271573	C	A	6	32590501	0.0309673	0.0040228	0.593643	1.39991e-14	0.000514998	59.2574
48	rs9910747	C	A	17	17433959	0.045315	0.00819683	0.062203	3.2e-08	0.000265678	30.5622
49	rs998584	A	C	6	43757896	0.0274841	0.00395781	0.482288	3.80014e-12	0.000419132	48.222

## Sheet: SFAs
	SNP	effect allele	other allele	chr	pos	beta	se	eaf	pval	PVE	FSTAT
1	rs102275	C	T	11	61557803	-0.0437478	0.0042558	0.349751	8.69961e-25	0.000917975	105.668
2	rs1119695	G	A	7	10622390	-0.0299065	0.00536278	0.823111	2.5e-08	0.000270342	31.0988
3	rs117733303	G	A	6	160922870	-0.102864	0.0150959	0.018512	9.49948e-12	0.000403565	46.4303
4	rs1229984	C	T	4	100239319	0.145346	0.0123135	0.972541	3.69999e-32	0.00121003	139.327
5	rs12412743	T	C	10	114045333	-0.0323084	0.00545879	0.16682	3.2e-09	0.000304499	35.0292
6	rs1260326	C	T	2	27730940	-0.0553075	0.00416082	0.604008	2.60016e-40	0.00153399	176.686
7	rs2495730	C	T	10	102361277	-0.0406095	0.00562953	0.155244	5.40008e-13	0.000452266	52.0359
8	rs261290	C	T	15	58678720	-0.0485282	0.00428895	0.654648	1.10002e-29	0.00111194	128.02
9	rs2642438	G	A	1	220970028	0.0465484	0.00446039	0.703828	1.69981e-25	0.00094609	108.907
10	rs2792703	T	C	10	113931690	-0.0368602	0.00452677	0.719197	3.90032e-16	0.000576193	66.3027
11	rs2980888	C	T	8	126507308	-0.0511102	0.00443961	0.698822	1.10002e-30	0.00115108	132.531
12	rs3130290	C	T	6	32174957	0.0317416	0.00415606	0.603432	2.19989e-14	0.000506936	58.3293
13	rs35650232	G	T	19	49259973	-0.0313658	0.0051108	0.2217	8.40001e-10	0.000327395	37.6641
14	rs473224	G	T	15	58737341	-0.0423304	0.00583455	0.853934	4.00037e-13	0.000457479	52.6359
15	rs4810479	T	C	20	44545048	-0.0266002	0.0047008	0.750178	1.5e-08	0.000278346	32.0198
16	rs55730499	T	C	6	161005610	-0.0735112	0.0075208	0.079855	1.50003e-22	0.000830038	95.537
17	rs56017239	G	A	17	40989002	0.0605977	0.0110205	0.036382	3.79997e-08	0.00026283	30.2345
18	rs603424	A	G	10	102075479	0.0508101	0.00535379	0.17386	2.29985e-21	0.000782559	90.0679
19	rs6754311	C	T	2	136707982	-0.0266747	0.004603	0.264724	6.80002e-09	0.000291924	33.5822
20	rs73045691	A	G	19	45440529	-0.0255452	0.00464241	0.304275	3.69999e-08	0.000263207	30.2778
21	rs738408	T	C	22	44324730	-0.0465313	0.004938	0.216534	4.40048e-21	0.000771494	88.7934

## Sheet: n-3 PUFAS
	SNP	effect allele	other allele	chr	pos	beta	se	eaf	pval	PVE	FSTAT
1	rs1077835	G	A	15	58723426	0.0910667	0.00479257	0.219711	1.69981e-80	0.00312968	361.056
2	rs112875651	A	G	8	126506694	-0.0517835	0.00411717	0.392337	2.80027e-36	0.00137362	158.189
3	rs11379773	GT	G	5	87695669	0.0274232	0.00484826	0.213412	1.5e-08	0.000278114	31.9931
4	rs11681659	T	C	2	136820960	-0.0275604	0.00437565	0.716465	2.99999e-10	0.000344838	39.6715
5	rs12226389	C	T	11	61823630	-0.0642431	0.00511013	0.185805	2.99985e-36	0.00137237	158.045
6	rs1260326	C	T	2	27730940	-0.03861	0.004051	0.604008	1.59993e-21	0.000789245	90.838
7	rs139974673	C	T	15	44027885	0.083441	0.0124929	0.025916	2.39994e-11	0.000387743	44.6092
8	rs145786300	A	G	11	61406089	-0.188873	0.0187215	0.011993	6.20012e-24	0.000884207	101.777
9	rs150370599	T	C	11	60718792	0.0472803	0.00726173	0.080318	7.50067e-11	0.000368468	42.3909
10	rs1532085	G	A	15	58683366	-0.078198	0.0040709	0.613968	3.10027e-82	0.00319815	368.98
11	rs16940904	T	C	17	44186063	-0.041183	0.00475547	0.226566	4.70002e-18	0.000651697	74.9966
12	rs174564	G	A	11	61588305	-0.391303	0.00412995	0.347009	1e-200	0.0724059	8976.96
13	rs182611493	G	A	19	19458388	-0.181074	0.0190938	0.012519	2.49977e-21	0.000781389	89.9332
14	rs195445	T	C	11	61744342	-0.038133	0.00426447	0.688414	3.80014e-19	0.000694783	79.9584
15	rs272888	C	T	5	131665423	0.028298	0.00434971	0.706966	7.70016e-11	0.000367884	42.3237
16	rs4000713	A	G	7	25990597	-0.0267482	0.00434956	0.295416	7.79992e-10	0.000328727	37.8173
17	rs508049	T	C	11	68675497	-0.10589	0.009204	0.049239	1.20005e-30	0.00114957	132.358
18	rs58542926	T	C	19	19379549	-0.132116	0.00756045	0.074379	2.19989e-68	0.00264816	305.357
19	rs61886804	G	T	10	96749936	0.0351105	0.0049535	0.200238	1.39991e-12	0.000436656	50.2391
20	rs62466318	T	C	7	73042085	-0.0404238	0.00493739	0.204201	2.70023e-16	0.000582513	67.0304
21	rs638714	T	G	1	62906489	-0.0322008	0.00418219	0.345965	1.39991e-14	0.000515207	59.2814
22	rs6693447	G	T	1	2330190	0.0255397	0.00397732	0.461701	1.40001e-10	0.000358405	41.2328
23	rs6717316	A	G	2	79703384	-0.0240496	0.00420843	0.670048	1.09999e-08	0.000283878	32.6564
24	rs72654473	A	C	19	45414399	0.0390547	0.00639034	0.108331	9.90011e-10	0.000324666	37.35
25	rs7924036	T	G	10	65191645	0.0374032	0.00396292	0.504218	3.80014e-21	0.000773981	89.0798
26	rs7944950	C	T	11	75505827	-0.0741144	0.00706143	0.085668	8.99912e-26	0.000956938	110.157
27	rs8074191	C	T	17	17407191	-0.0268897	0.00462305	0.756121	5.99998e-09	0.000294081	33.8304
28	rs9947684	G	A	18	47166694	0.0282504	0.00416339	0.654466	1.20005e-11	0.000400185	46.0413

## Sheet: n-6 PUFAs
	SNP	effect allele	other allele	chr	pos	beta	se	eaf	pval	PVE	FSTAT
1	rs10455872	G	A	6	161010118	0.138305	0.0073371	0.078987	2.90001e-79	0.00308011	355.32
2	rs1047964	T	G	11	117156893	0.17031	0.0201508	0.010066	2.90001e-17	0.000620734	71.4312
3	rs10733306	T	C	9	16048248	0.0220496	0.00400412	0.460028	3.69999e-08	0.000263604	30.3235
4	rs10773049	C	T	12	124506631	0.022457	0.00405767	0.393124	3.09999e-08	0.000266265	30.6297
5	rs111351217	A	G	17	41163974	-0.0497368	0.00903706	0.052245	3.69999e-08	0.000263309	30.2896
6	rs11429307	GT	G	5	55857025	-0.0445358	0.00504741	0.191495	1.10002e-18	0.000676499	77.8527
7	rs11508026	T	C	16	56999328	0.027324	0.00401029	0.432471	9.49948e-12	0.000403498	46.4226
8	rs1168030	T	C	1	62968491	-0.0492915	0.00413738	0.644929	1e-32	0.00123264	141.934
9	rs116843064	A	G	19	8429323	0.183791	0.0142031	0.01986	2.70023e-38	0.00145388	167.446
10	rs117733303	G	A	6	160922870	0.209889	0.014679	0.018512	2.19989e-46	0.00177458	204.446
11	rs12212146	C	T	6	161125454	-0.0567627	0.00774962	0.07432	2.39994e-13	0.000466275	53.6485
12	rs12419462	A	G	11	27623309	-0.0285755	0.00471709	0.228758	1.40001e-09	0.000318992	36.6971
13	rs1260326	C	T	2	27730940	0.109743	0.00404504	0.604008	4.29536e-162	0.00635941	736.038
14	rs13389219	T	C	2	165528876	0.038325	0.00405363	0.392574	3.19963e-21	0.000776637	89.3858
15	rs139974673	C	T	15	44027885	-0.138506	0.0124863	0.025916	1.39991e-28	0.00106877	123.044
16	rs1546224	T	C	12	63696548	-0.0236674	0.00429622	0.308641	3.59998e-08	0.000263811	30.3473
17	rs1736070	T	C	8	11665805	0.0259828	0.00425289	0.666408	1e-09	0.000324446	37.3247
18	rs174528	C	T	11	61543499	0.0251335	0.00408383	0.377233	7.49998e-10	0.000329236	37.8759
19	rs1801689	C	A	17	64210580	0.0641739	0.0115152	0.03052	2.5e-08	0.000269983	31.0575
20	rs2068888	A	G	10	94839642	0.0257216	0.0039792	0.450146	1e-10	0.000363184	41.7827
21	rs261290	C	T	15	58678720	0.0617512	0.00417436	0.654648	1.59993e-49	0.00189917	218.828
22	rs28752523	T	C	6	32584772	-0.0353026	0.00500867	0.193826	1.80011e-12	0.000431778	49.6776
23	rs295268	C	T	9	86429305	0.0280531	0.00454438	0.256162	6.69993e-10	0.000331244	38.107
24	rs2972140	C	T	2	227104111	-0.0340375	0.00414245	0.650628	2.09991e-16	0.000586713	67.5139
25	rs35169799	T	C	11	64031241	-0.0485534	0.00814674	0.063323	2.5e-09	0.000308757	35.5193
26	rs3860846	T	C	8	126631687	-0.030052	0.00447696	0.275985	1.9002e-11	0.000391642	45.0581
27	rs4646246	G	A	8	18248661	-0.028569	0.00511872	0.182591	2.39999e-08	0.000270788	31.1501
28	rs4665710	C	A	2	21221035	-0.047267	0.00486875	0.792573	2.80027e-22	0.000818851	94.2483
29	rs473224	G	T	15	58737341	0.0600834	0.00567866	0.853934	3.69999e-26	0.000972466	111.946
30	rs58489806	T	C	19	19456917	0.070387	0.00707508	0.086416	2.60016e-23	0.000859861	98.9725
31	rs6073958	C	T	20	44551855	-0.0474619	0.00497167	0.198745	1.29987e-21	0.00079181	91.1335
32	rs6658257	G	A	1	93820684	-0.0228432	0.00405119	0.602158	1.7e-08	0.000276381	31.7937
33	rs684773	C	A	3	135956305	-0.0347116	0.00468622	0.767069	1.29987e-13	0.000476844	54.8651
34	rs6905288	A	G	6	43758873	-0.02552	0.00398662	0.568514	1.5e-10	0.000356186	40.9774
35	rs6938550	A	G	6	20462138	0.0399771	0.00706603	0.914146	1.5e-08	0.000278247	32.0084
36	rs72555385	G	A	7	73123473	-0.0540068	0.0091908	0.049314	4.20001e-09	0.000300151	34.5289
37	rs72836561	T	C	17	41926126	-0.0837853	0.011342	0.031481	1.50003e-13	0.000474275	54.5694
38	rs7402939	C	T	15	99183876	-0.023501	0.00413068	0.623528	1.29999e-08	0.000281376	32.3685
39	rs78058190	A	G	2	219699999	-0.0667368	0.010245	0.050111	7.29962e-11	0.00036883	42.4326
40	rs9908820	G	A	17	73408819	-0.0279066	0.00446315	0.729127	4e-10	0.000339831	39.0952

## Sheet: DHAs
	SNP	effect allele	other allele	chr	pos	beta	se	eaf	pval	PVE	FSTAT
1	rs10455872	G	A	6	161010118	0.0822512	0.00739599	0.078987	9.8992e-29	0.00107425	123.676
2	rs11681659	T	C	2	136820960	-0.0272708	0.00440326	0.716465	5.89997e-10	0.000333412	38.3566
3	rs117733303	G	A	6	160922870	0.121608	0.0147968	0.018512	2.09991e-16	0.000586966	67.5431
4	rs12226389	C	T	11	61823630	-0.0458809	0.00515924	0.185805	6.00067e-19	0.000687184	79.0833
5	rs145786300	A	G	11	61406089	-0.14189	0.0189014	0.011993	6.09958e-14	0.000489759	56.3518
6	rs1532085	G	A	15	58683366	-0.0581405	0.00409769	0.613968	1.10002e-45	0.00174743	201.313
7	rs16940904	T	C	17	44186063	-0.038921	0.00478564	0.226566	4.19952e-16	0.000574801	66.1425
8	rs174564	G	A	11	61588305	-0.274933	0.00416965	0.347009	1e-200	0.0364266	4347.57
9	rs1800588	T	C	15	58723675	0.0677672	0.0048429	0.215519	1.69981e-44	0.00169969	195.804
10	rs195445	T	C	11	61744342	-0.0298494	0.00430545	0.688414	4.10015e-12	0.000417765	48.0647
11	rs2294919	T	C	22	44342325	-0.0269599	0.00463855	0.247932	6.19998e-09	0.000293646	33.7804
12	rs272888	C	T	5	131665423	0.0252022	0.00437739	0.706966	8.50002e-09	0.000288138	33.1466
13	rs3826688	C	T	19	45418961	-0.0234083	0.00419386	0.64095	2.39999e-08	0.000270816	31.1533
14	rs508049	T	C	11	68675497	-0.0976913	0.00929247	0.049239	7.50067e-26	0.00096009	110.52
15	rs58411334	T	G	11	75467350	-0.0377501	0.00684407	0.093795	3.50002e-08	0.000264467	30.4228
16	rs58542926	T	C	19	19379549	-0.0437276	0.0076096	0.074379	9.09997e-09	0.00028704	33.0202
17	rs61886804	G	T	10	96749936	0.0277284	0.00498419	0.200238	2.59998e-08	0.000269044	30.9494
18	rs6452788	A	G	5	87712913	0.0265588	0.004674	0.239958	1.29999e-08	0.000280671	32.2873
19	rs676210	A	G	2	21231524	0.0362521	0.00491785	0.205781	1.69981e-13	0.00047227	54.3386
20	rs72836561	T	C	17	41926126	-0.0747647	0.0114233	0.031481	6.00067e-11	0.00037233	42.8354
21	rs7924036	T	G	10	65191645	0.045521	0.00398747	0.504218	3.50026e-30	0.00113192	130.323

## Sheet: LAs
	SNP	effect allele	other allele	chr	pos	beta	se	eaf	pval	PVE	FSTAT
1	rs10733306	T	C	9	16048248	0.0251941	0.00402274	0.460028	3.79997e-10	0.000340946	39.2235
2	rs11030088	A	G	11	27646247	-0.0309971	0.00459358	0.251146	1.50003e-11	0.000395774	45.5336
3	rs115740542	C	T	6	26123502	-0.0445895	0.00765752	0.073589	5.80003e-09	0.000294741	33.9064
4	rs116843064	A	G	19	8429323	0.114824	0.014272	0.01986	8.60003e-16	0.000562511	64.7274
5	rs1260326	C	T	2	27730940	0.0815217	0.00406648	0.604008	2.09991e-89	0.00348236	401.885
6	rs13179413	T	C	5	55868097	-0.0293835	0.00448985	0.2853	6.00067e-11	0.000372273	42.8288
7	rs13389219	T	C	2	165528876	0.028269	0.00407511	0.392574	4.00037e-12	0.000418254	48.121
8	rs141144647	A	G	11	61153501	0.0963654	0.0174444	0.014015	3.29997e-08	0.000265274	30.5157
9	rs147233090	T	C	15	44028047	-0.10949	0.0129371	0.024584	2.60016e-17	0.000622421	71.6255
10	rs150684478	T	G	11	61312726	0.142546	0.0250163	0.007859	1.2e-08	0.000282241	32.4681
11	rs174567	G	A	11	61593005	0.186379	0.00416279	0.348291	1e-200	0.0171317	2004.55
12	rs2180725	C	T	6	11025420	-0.0264252	0.00472321	0.231539	2.19999e-08	0.000272097	31.3007
13	rs2576362	T	G	9	86572575	0.0270562	0.00457308	0.254621	3.29997e-09	0.000304273	35.0033
14	rs2835028	C	A	21	36972695	0.0236974	0.00404689	0.411897	4.70002e-09	0.000298063	34.2887
15	rs2843126	G	A	1	2316315	0.0235361	0.00398166	0.51824	3.40001e-09	0.00030373	34.9408
16	rs2927468	G	A	19	45357939	0.0235598	0.00403511	0.52329	5.30005e-09	0.000296335	34.0898
17	rs2972143	G	A	2	227116365	-0.0278975	0.0041516	0.645871	1.80011e-11	0.000392472	45.1536
18	rs34062580	A	G	7	73033559	0.066051	0.00591377	0.130299	5.79963e-29	0.00108352	124.745
19	rs34620476	A	C	16	56996649	0.0306969	0.00402018	0.43221	2.19989e-14	0.000506708	58.3029
20	rs4299376	T	G	2	44072576	-0.0276487	0.00426143	0.676282	8.69961e-11	0.000365897	42.0951
21	rs4810479	T	C	20	44545048	0.0386953	0.00459733	0.750178	3.90032e-17	0.000615626	70.8431
22	rs58365744	C	A	1	171128038	-0.0266933	0.00482485	0.218557	3.2e-08	0.000266073	30.6076
23	rs58489806	T	C	19	19456917	0.0407904	0.0071094	0.086416	9.59997e-09	0.000286158	32.9187
24	rs6683445	A	C	1	16368403	-0.0241725	0.00400692	0.532311	1.6e-09	0.000316347	36.3927
25	rs738408	T	C	22	44324730	0.035356	0.00483108	0.216534	2.49977e-13	0.000465495	53.5587
26	rs78058190	A	G	2	219699999	-0.0619842	0.0102992	0.050111	1.79999e-09	0.000314846	36.2199
27	rs7819706	G	A	8	19844415	0.0675482	0.00615627	0.118288	5.19996e-28	0.00104572	120.388
28	rs9908820	G	A	17	73408819	-0.0254012	0.0044846	0.729127	1.5e-08	0.000278881	32.0814

## Sheet: n-6 to n-3
	SNP	effect allele	other allele	chr	pos	beta	se	eaf	pval	PVE
1	rs1077835	G	A	15	58723426	-0.0998071	0.00480305	0.219711	6.59933e-96	0.00374059
2	rs112875651	A	G	8	126506694	0.0719492	0.00412529	0.392337	4.00037e-68	0.002638
3	rs116843064	A	G	19	8429323	0.0882813	0.014248	0.01986	5.80003e-10	0.000333706
4	rs117143374	C	T	21	40555561	0.0318136	0.00571328	0.14225	2.59998e-08	0.000269536
5	rs12226389	C	T	11	61823630	0.0592832	0.00512548	0.185805	6.09958e-31	0.0011619
6	rs1260326	C	T	2	27730940	0.066446	0.00405986	0.604008	3.29989e-60	0.00232372
7	rs139974673	C	T	15	44027885	-0.117068	0.0125202	0.025916	8.69961e-21	0.000759632
8	rs145786300	A	G	11	61406089	0.176634	0.0187777	0.011993	5.10035e-21	0.000768793
9	rs150370599	T	C	11	60718792	-0.0475725	0.00728355	0.080318	6.4998e-11	0.000370804
10	rs1532085	G	A	15	58683366	0.0862885	0.00407981	0.613968	2.80027e-99	0.00387453
11	rs174564	G	A	11	61588305	0.371159	0.00414236	0.347009	1e-200	0.0652526
12	rs182611493	G	A	19	19458388	0.19692	0.0191342	0.012519	7.70016e-25	0.000920108
13	rs195445	T	C	11	61744342	0.0344283	0.00427728	0.688414	8.30042e-16	0.000563029
14	rs2394976	T	G	6	31311912	0.0315075	0.00538488	0.161642	4.90004e-09	0.000297595
15	rs4000713	A	G	7	25990597	0.0302187	0.00435921	0.295416	4.10015e-12	0.000417671
16	rs583609	C	T	1	62916796	0.0428152	0.0041587	0.352508	7.39946e-25	0.000920789
17	rs58542926	T	C	19	19379549	0.144499	0.00757644	0.074379	4.30031e-81	0.00315288
18	rs62466318	T	C	7	73042085	0.0599701	0.00494834	0.204201	8.4004e-34	0.00127549
19	rs6693447	G	T	1	2330190	-0.0250996	0.00398654	0.461701	3.09999e-10	0.000344565
20	rs673335	C	T	11	75450576	0.0611093	0.00541161	0.159752	1.39991e-29	0.00110754
21	rs7819706	G	A	8	19844415	0.0363774	0.00614755	0.118288	3.29997e-09	0.000304373
22	rs8074191	C	T	17	17407191	0.0281472	0.00463331	0.756121	1.2e-09	0.000320795
23	rs9332238	A	G	10	96748492	-0.0347177	0.00498195	0.198299	3.19963e-12	0.000422084
24	rs9947684	G	A	18	47166694	-0.0276606	0.00417279	0.654466	3.40017e-11	0.00038193

## Sheet: PUFAs to MUFAs
	SNP	effect allele	other allele	chr	pos	beta	se	eaf	pval	PVE	FSTAT
1	rs10455872	G	A	6	161010118	0.134049	0.00732476	0.078987	8.10028e-75	0.00290373	334.914
2	rs1047964	T	G	11	117156893	0.208578	0.0200899	0.010066	2.99985e-25	0.000936384	107.789
3	rs10937924	C	T	4	3374898	-0.0246006	0.00402414	0.591416	9.80009e-10	0.000324851	37.3713
4	rs11207994	T	C	1	63047987	0.0483135	0.00414235	0.350968	1.99986e-31	0.00118143	136.03
5	rs11235	C	T	3	52745087	-0.0221257	0.00396421	0.455563	2.39999e-08	0.000270796	31.1511
6	rs11429307	GT	G	5	55857025	-0.0451157	0.00503968	0.191495	3.50026e-19	0.000696348	80.1386
7	rs11644601	C	T	16	15172118	0.0656563	0.00434417	0.296674	1.29987e-51	0.00198224	228.419
8	rs116843064	A	G	19	8429323	0.202603	0.0141832	0.01986	2.70023e-46	0.00177114	204.05
9	rs117733303	G	A	6	160922870	0.209953	0.0146543	0.018512	1.50003e-46	0.00178164	205.261
10	rs12212146	C	T	6	161125454	-0.0594838	0.00773658	0.07432	1.50003e-14	0.000513755	59.1142
11	rs1260326	C	T	2	27730940	0.0928958	0.00403812	0.604008	4.19759e-117	0.00458057	529.208
12	rs13389219	T	C	2	165528876	0.0378446	0.00404669	0.392574	8.60003e-21	0.000759902	87.4582
13	rs139110024	T	G	16	15419784	-0.0612664	0.0111832	0.038881	4.30002e-08	0.000260903	30.0127
14	rs141469619	G	A	11	116714293	-0.235376	0.0208626	0.010139	1.59993e-29	0.00110557	127.286
15	rs149402055	T	C	11	68525539	-0.0981143	0.0148999	0.019716	4.60045e-11	0.000376889	43.3601
16	rs150844304	C	A	15	43726625	-0.120063	0.0125136	0.025675	8.4004e-22	0.000799808	92.0548
17	rs174564	G	A	11	61588305	-0.171218	0.004138	0.347009	1e-200	0.0146683	1712.03
18	rs1801689	C	A	17	64210580	0.069546	0.0114995	0.03052	1.5e-09	0.000317927	36.5745
19	rs182549	T	C	2	136616754	-0.0245223	0.00446797	0.738671	4.09996e-08	0.000261859	30.1227
20	rs2035816	G	A	4	100508556	0.0393916	0.00712954	0.084302	3.29997e-08	0.000265368	30.5265
21	rs2049245	T	G	4	171566778	0.0252177	0.00437515	0.294001	8.19993e-09	0.000288788	33.2214
22	rs2302263	T	C	11	64021821	-0.0444171	0.0069839	0.088121	2e-10	0.000351586	40.448
23	rs283814	G	A	19	45389224	-0.0501976	0.00737568	0.922413	1e-11	0.000402593	46.3185
24	rs2925979	C	T	16	81534790	0.0276226	0.00430905	0.698985	1.5e-10	0.000357183	41.0921
25	rs2972140	C	T	2	227104111	-0.0372675	0.00413536	0.650628	1.99986e-19	0.000705678	81.2131
26	rs35163364	T	C	7	128732786	0.0231875	0.00400474	0.432061	7.00003e-09	0.000291415	33.5237
27	rs4963506	A	G	11	62187666	-0.0305383	0.00498498	0.19572	8.99995e-10	0.000326213	37.528
28	rs56156922	C	T	16	56987369	0.034575	0.00423943	0.32432	3.50026e-16	0.000578013	66.5123
29	rs603424	A	G	10	102075479	0.0329406	0.00520152	0.17386	2.39999e-10	0.000348603	40.1047
30	rs6073958	C	T	20	44551855	-0.0569452	0.00496527	0.198745	1.9002e-30	0.00114238	131.529
31	rs632057	G	T	6	139834012	0.0289383	0.00408785	0.627772	1.50003e-12	0.000435558	50.1128
32	rs655720	T	C	3	136103267	-0.0299513	0.00440712	0.718817	1.10002e-11	0.000401446	46.1864
33	rs673548	A	G	2	21237544	0.0632408	0.00486886	0.206089	1.39991e-38	0.00146482	168.707
34	rs67981690	G	A	12	21343886	-0.032937	0.00592702	0.129099	2.69998e-08	0.000268447	30.8807
35	rs6866758	T	C	5	156455112	0.0301443	0.00511112	0.186697	3.69999e-09	0.000302361	34.7833
36	rs72555385	G	A	7	73123473	-0.057192	0.00917792	0.049314	4.60002e-10	0.000337532	38.8306
37	rs72836561	T	C	17	41926126	-0.10669	0.0113266	0.031481	4.49987e-21	0.000770891	88.7239
38	rs7402939	C	T	15	99183876	-0.0228208	0.00412623	0.623528	3.2e-08	0.0002659	30.5877
39	rs752446	A	G	8	10649767	-0.0318251	0.00408156	0.375217	6.29941e-15	0.000528369	60.7966
40	rs78058190	A	G	2	219699999	-0.0701519	0.0102274	0.050111	6.89922e-12	0.000408931	47.048
41	rs7924036	T	G	10	65191645	0.0433983	0.00395329	0.504218	4.90004e-28	0.00104677	120.509
42	rs79293855	A	G	19	8420583	0.0621565	0.0113383	0.031468	4.20001e-08	0.000261242	30.0517
43	rs79598313	T	C	1	27284913	-0.0907507	0.0131236	0.023212	4.70002e-12	0.000415617	47.8175
44	rs9271573	C	A	6	32590501	-0.0285962	0.00402135	0.593643	1.20005e-12	0.000439503	50.5668
45	rs9419746	T	C	10	94508055	-0.0285046	0.00489086	0.212625	5.60003e-09	0.000295264	33.9666
46	rs9908820	G	A	17	73408819	-0.0260574	0.0044571	0.729127	5e-09	0.000297104	34.1783
47	rs998584	A	C	6	43757896	-0.0258306	0.00395639	0.482288	6.59933e-11	0.000370501	42.6249
