# Supplementary material for: Lower plasma linoleic acids as a risk factor for gout: an integrated analysis of population-based cohort and genetic data
Source: Royal Society of Chemistry journal article supplement (doi:10.1039/d4fo00987h), 2024-01-01
Supplement: d4fo00987h2.pdf [file d4fo00987h2.pdf]

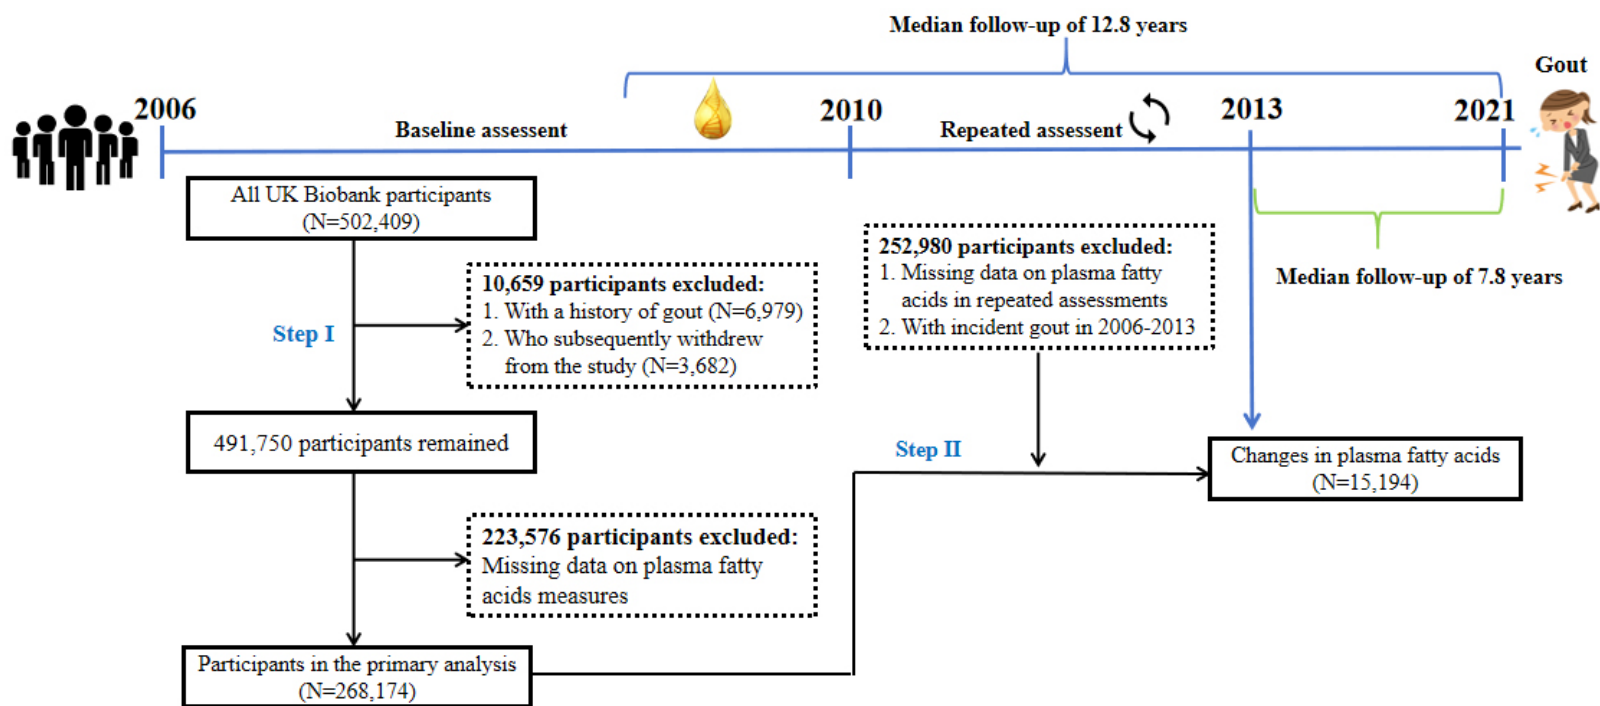

**Supplementary Figure 1.** Flowchart of the selection of participant selection from the UK Biobank study

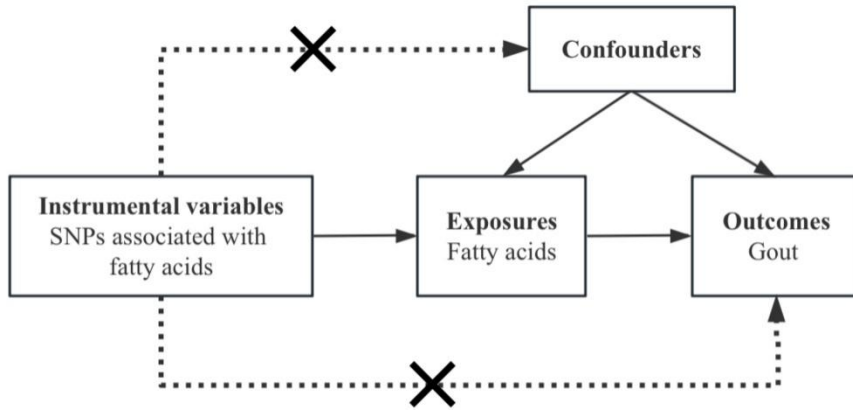

**Supplementary Figure 2.** Conceptual framework for the Mendelian randomization analysis.

The core assumptions in an MR study, where genetic variants (i) should be robustly associated with the exposure, (ii) should be independent of any confounders of the exposure–outcome relationship, and (iii) should be associated with the outcome only via the exposure.

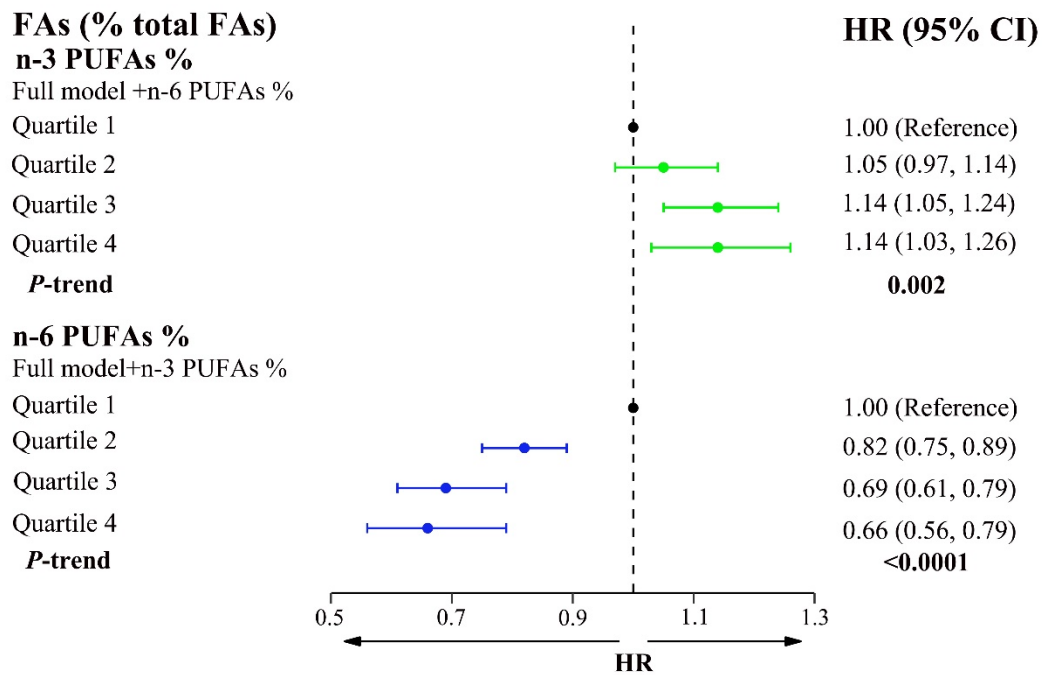

**Supplementary Figure 3.** Hazard ratios of incident gout associated with baseline plasma fatty acids (percentages in total fatty acids)

Results were adjusted for multivariable (model 1+MUFAs %+SFAs % in Table 2) and further adjusted for n-3 PUFAs % or n-6 PUFAs%

PUFAs, polyunsaturated fatty acids

**Supplementary Table 1.** The GWAS IDs of exposure and outcome

| <b>Exposure</b>       | <b>GWAS IDs</b>    |
|-----------------------|--------------------|
| Ratio of PUFA to TFA  | ebi-a-GCST90092941 |
| Ratio of MUFA to TFA  | ebi-a-GCST90092929 |
| Ratio of SFA to TFA   | ebi-a-GCST90092981 |
| Ratio of n-3 to TFA   | ebi-a-GCST90092932 |
| Ratio of n-6 to TFA   | ebi-a-GCST90092935 |
| Ratio of DHA to TFA   | ebi-a-GCST90092817 |
| Ratio of LA to TFA    | ebi-a-GCST90092881 |
| Ratio of n-6 to n-3   | ebi-a-GCST90092934 |
| Ratio of PUFA to MUFA | ebi-a-GCST90092940 |
| <b>Outcome</b>        |                    |
| Gout                  | finn-b-M13_GOUT    |



|                             |               |               |               |               |               |              |              |               |
|-----------------------------|---------------|---------------|---------------|---------------|---------------|--------------|--------------|---------------|
| Never                       | 2,646 (3.9)   | 2,622 (3.9)   | 2778 (4.1)    | 3734 (5.6)    | 2,717 (4.1)   | 2949 (4.4)   | 3164 (4.7)   | 2,950 (4.4)   |
| Previous                    | 2,687 (4.0)   | 2,357 (3.5)   | 2,090 (3.1)   | 2,433 (3.6)   | 1,763 (2.6)   | 2252 (3.4)   | 2486 (3.7)   | 3,066 (4.6)   |
| Current                     | 61,515 (91.8) | 61,944 (92.4) | 62,057 (92.6) | 60,682 (90.5) | 62,369 (93.1) | 61699 (92.0) | 61259 (91.4) | 60,871 (90.8) |
| Lipid-lowering drugs, n (%) | 16,236 (24.2) | 11,803 (17.6) | 9,260 (13.8)  | 8,937 (13.3)  | 7,470 (11.1)  | 9056 (13.5)  | 11847 (17.7) | 17,863 (26.6) |
| Aspirin, n (%)              | 11,793 (17.6) | 9,352 (13.9)  | 7,846 (11.7)  | 7,732 (11.5)  | 6,809 (10.2)  | 7853 (11.7)  | 9385 (14.0)  | 12,676 (18.9) |
| Diabetes, n (%)             | 7,439 (11.1)  | 3,763 (5.6)   | 2,610 (3.9)   | 2,486 (3.7)   | 1,893 (2.8)   | 2464 (3.7)   | 3956 (5.9)   | 7,985 (11.9)  |
| CKD, n (%)                  | 5,097 (7.6)   | 3,520 (5.2)   | 2,277 (3.4)   | 1,543 (2.3)   | 1,214 (1.8)   | 2087 (3.1)   | 3482 (5.2)   | 5,654 (8.4)   |

BMI, body mass index; CKD, chronic kidney disease;  
Data are mean (SD) or number (%)

**Supplementary Table 3.** Associations of plasma fatty acids (percentages in total fatty acids) with risk of incident gout after excluding gout cases occurring in the first two years of follow-up (N=266, 204)

|                           | Quartile for FAs % |                   |                   |                   | <i>P</i> -trend |
|---------------------------|--------------------|-------------------|-------------------|-------------------|-----------------|
|                           | Quartile 1         | Quartile 2        | Quartile 3        | Quartile 4        |                 |
| <b>PUFAs %</b>            |                    |                   |                   |                   |                 |
| Events                    | 2,100              | 1,113             | 720               | 492               |                 |
| Model 1                   | 1.00 (Ref.)        | 0.71 (0.66, 0.76) | 0.58 (0.53, 0.63) | 0.44 (0.40, 0.49) | <0.0001         |
| Model 1+MUFAs % + SFAs %  | 1.00 (Ref.)        | 0.78 (0.71, 0.87) | 0.70 (0.60, 0.82) | 0.58 (0.47, 0.73) | <0.0001         |
| <b>MUFAs %</b>            |                    |                   |                   |                   |                 |
| Events                    | 463                | 728               | 1,109             | 2,125             |                 |
| Model 1                   | 1.00 (Ref.)        | 1.23 (1.09, 1.39) | 1.47 (1.32, 1.65) | 2.06 (1.85, 2.30) | <0.0001         |
| Model 1+PUFAs % + SFAs %  | 1.00 (Ref.)        | 1.08 (0.95, 1.23) | 1.11 (0.96, 1.29) | 1.33 (1.10, 1.59) | 0.0006          |
| <b>SFAs %</b>             |                    |                   |                   |                   |                 |
| Events                    | 857                | 907               | 1,021             | 1,640             |                 |
| Model 1                   | 1.00 (Ref.)        | 1.15 (1.04, 1.26) | 1.22 (1.12, 1.34) | 1.61 (1.48, 1.75) | <0.0001         |
| Model 1+PUFAs % + MUFAs % | 1.00 (Ref.)        | 1.01 (0.91, 1.12) | 0.97 (0.86, 1.09) | 1.11 (0.98, 1.26) | 0.675           |
| <b>n-3 PUFAs %</b>        |                    |                   |                   |                   |                 |
| Events                    | 1,088              | 1,166             | 1,169             | 1,002             |                 |
| Model 1                   | 1.00 (Ref.)        | 1.07 (0.99, 1.17) | 1.13 (1.04, 1.23) | 1.10 (1.00, 1.20) | <0.0001         |
| Model 1+MUFAs % + SFAs %  | 1.00 (Ref.)        | 1.10 (1.01, 1.20) | 1.20 (1.10, 1.31) | 1.31 (1.19, 1.43) | <0.0001         |
| <b>DHAs %</b>             |                    |                   |                   |                   |                 |
| Events                    | 1,546              | 1,164             | 929               | 786               |                 |
| Model 1                   | 1.00 (Ref.)        | 0.92 (0.86, 1.00) | 0.85 (0.78, 0.92) | 0.80 (0.73, 0.88) | 0.0015          |
| Model 1+MUFAs % + SFAs %  | 1.00 (Ref.)        | 1.12 (1.03, 1.21) | 1.18 (1.08, 1.30) | 1.34 (1.20, 1.49) | <0.0001         |
| <b>n-6 PUFAs %</b>        |                    |                   |                   |                   |                 |
| Events                    | 2,099              | 1,115             | 699               | 512               |                 |
| Model 1                   | 1.00 (Ref.)        | 0.71 (0.66, 0.76) | 0.55 (0.50, 0.60) | 0.45 (0.41, 0.50) | <0.0001         |
| Model 1+MUFAs % + SFAs %  | 1.00 (Ref.)        | 0.78 (0.71, 0.85) | 0.65 (0.58, 0.74) | 0.58 (0.49, 0.68) | <0.0001         |

|                            |             |                   |                   |                   |         |
|----------------------------|-------------|-------------------|-------------------|-------------------|---------|
| <b>LAs %</b>               |             |                   |                   |                   |         |
| Events                     | 2,166       | 1,112             | 689               | 458               |         |
| Model 1                    | 1.00 (Ref.) | 0.72 (0.66, 0.77) | 0.55 (0.50, 0.60) | 0.43 (0.39, 0.48) | <0.0001 |
| Model 1+MUFAs %+SFAs %     | 1.00 (Ref.) | 0.79 (0.73, 0.86) | 0.65 (0.58, 0.72) | 0.55 (0.48, 0.62) | <0.0001 |
| <b>PUFAs/MUFAs ratio</b>   |             |                   |                   |                   |         |
| Events                     | 2,148       | 1,109             | 703               | 465               |         |
| Model 1                    | 1.00 (Ref.) | 0.70 (0.65, 0.75) | 0.56 (0.52, 0.62) | 0.46 (0.41, 0.51) | <0.0001 |
| <b>n-6/n-3 PUFAs ratio</b> |             |                   |                   |                   |         |
| Events                     | 1,323       | 1,175             | 1,041             | 886               |         |
| Model 1                    | 1.00 (Ref.) | 0.86 (0.80, 0.93) | 0.78 (0.72, 0.84) | 0.69 (0.64, 0.76) | <0.0001 |

DHAs, docosahexaenoic acids; LAs, linoleic acids; MUFAs, monounsaturated fatty acids; PUFAs, polyunsaturated fatty acids; SFAs, saturated fatty acids.

Model 1 was adjusted for age (years), sex (male, female), race/ethnicity (White, Asian or Asian British, Black or Black British, Mixed), social deprivation score (in quintiles), BMI (kg/m<sup>2</sup>), smoking status (never, former, current), alcohol consumption (never, former, current), use of lipid-lowering medication (yes, no) and aspirin (yes, no), and history of diabetes (yes, no) and chronic kidney disease (yes, no) at baseline.

**Supplementary Table 4.** Associations of plasma fatty acids (percentages in total fatty acids) with risk of incident gout after excluding participants with extreme BMI (<18.5 or >40 kg/m<sup>2</sup>) (N=261,792)

|                        | Quartile for FAs % |                   |                   |                   | <i>P</i> -trend |
|------------------------|--------------------|-------------------|-------------------|-------------------|-----------------|
|                        | Quartile 1         | Quartile 2        | Quartile 3        | Quartile 4        |                 |
| <b>PUFAs %</b>         |                    |                   |                   |                   |                 |
| Events                 | 2,323              | 1,225             | 781               | 541               |                 |
| Model 1                | 1.00 (Ref.)        | 0.71 (0.66, 0.76) | 0.57 (0.53, 0.62) | 0.44 (0.40, 0.49) | <0.0001         |
| Model 1+MUFAs %+SFAs % | 1.00 (Ref.)        | 0.79 (0.72, 0.87) | 0.71 (0.61, 0.82) | 0.61 (0.49, 0.75) | <0.0001         |
| <b>MUFAs %</b>         |                    |                   |                   |                   |                 |

|                                  |             |                   |                   |                   |         |
|----------------------------------|-------------|-------------------|-------------------|-------------------|---------|
| Events                           | 498         | 795               | 1,229             | 2,348             |         |
| Model 1                          | 1.00 (Ref.) | 1.24 (1.11, 1.39) | 1.49 (1.34, 1.66) | 2.09 (1.88, 2.31) | <0.0001 |
| Model 1+PUFAs % <b>+</b> SFAs %  | 1.00 (Ref.) | 1.10 (0.97, 1.24) | 1.15 (0.99, 1.33) | 1.38 (1.16, 1.64) | <0.0001 |
| <b>SFAs %</b>                    |             |                   |                   |                   |         |
| Events                           | 958         | 985               | 1,084             | 1,843             |         |
| Model 1                          | 1.00 (Ref.) | 1.12 (1.02, 1.22) | 1.16 (1.06, 1.26) | 1.59 (1.46, 1.72) | <0.0001 |
| Model 1+PUFAs % <b>+</b> MUFAs % | 1.00 (Ref.) | 0.99 (0.90, 1.09) | 0.92 (0.82, 1.03) | 1.10 (0.98, 1.24) | 0.054   |
| <b>n-3 PUFAs %</b>               |             |                   |                   |                   |         |
| Events                           | 1,196       | 1,273             | 1,302             | 1,099             |         |
| Model 1                          | 1.00 (Ref.) | 1.06 (0.98, 1.14) | 1.14 (1.05, 1.23) | 1.09 (1.00, 1.19) | 0.013   |
| Model 1+MUFAs % <b>+</b> SFAs %  | 1.00 (Ref.) | 1.08 (1.00, 1.17) | 1.21 (1.12, 1.31) | 1.30 (1.19, 1.42) | <0.0001 |
| <b>DHAs %</b>                    |             |                   |                   |                   |         |
| Events                           | 1,726       | 1,245             | 1,039             | 860               |         |
| Model 1                          | 1.00 (Ref.) | 0.89 (0.82, 0.96) | 0.86 (0.79, 0.93) | 0.79 (0.73, 0.86) | <0.0001 |
| Model 1+MUFAs % <b>+</b> SFAs %  | 1.00 (Ref.) | 1.07 (0.99, 1.15) | 1.19 (1.09, 1.30) | 1.32 (1.20, 1.47) | <0.0001 |
| <b>n-6 PUFAs %</b>               |             |                   |                   |                   |         |
| Events                           | 2,327       | 1,227             | 745               | 571               |         |
| Model 1                          | 1.00 (Ref.) | 0.71 (0.66, 0.76) | 0.53 (0.49, 0.58) | 0.46 (0.42, 0.51) | <0.0001 |
| Model 1+MUFAs % <b>+</b> SFAs %  | 1.00 (Ref.) | 0.78 (0.72, 0.85) | 0.63 (0.56, 0.71) | 0.59 (0.51, 0.69) | <0.0001 |
| <b>LAs %</b>                     |             |                   |                   |                   |         |
| Events                           | 2,386       | 1,222             | 750               | 512               |         |
| Model 1                          | 1.00 (Ref.) | 0.71 (0.66, 0.77) | 0.54 (0.50, 0.59) | 0.44 (0.40, 0.49) | <0.0001 |
| Model 1+MUFAs % <b>+</b> SFAs %  | 1.00 (Ref.) | 0.79 (0.73, 0.85) | 0.64 (0.58, 0.70) | 0.55 (0.49, 0.63) | <0.0001 |
| <b>PUFAs/MUFAs ratio</b>         |             |                   |                   |                   |         |
| Events                           | 2,371       | 1,228             | 767               | 504               |         |
| Model 1                          | 1.00 (Ref.) | 0.70 (0.65, 0.75) | 0.56 (0.52, 0.61) | 0.46 (0.41, 0.51) | <0.0001 |
| <b>n-6/n-3 PUFAs ratio</b>       |             |                   |                   |                   |         |
| Events                           | 1,446       | 1,328             | 1,138             | 958               |         |
| Model 1                          | 1.00 (Ref.) | 0.89 (0.83, 0.96) | 0.78 (0.72, 0.84) | 0.69 (0.64, 0.75) | <0.0001 |



DHAs, docosahexaenoic acids; LAs, linoleic acids; MUFAs, monounsaturated fatty acids; PUFAs, polyunsaturated fatty acids; SFAs, saturated fatty acids.

Model 1 was adjusted for age (years), sex (male, female), race/ethnicity (White, Asian or Asian British, Black or Black British, Mixed), social deprivation score (in quintiles), BMI (kg/m<sup>2</sup>), smoking status (never, former, current), alcohol consumption (never, former, current), use of lipid-lowering medication (yes, no) and aspirin (yes, no), and history of diabetes (yes, no) and chronic kidney disease (yes, no) at baseline.

**Supplementary Table 5.** Associations of plasma fatty acids (percentages in total fatty acids) with risk of incident gout when further adjusted for physical activity, history of cardiovascular disease and diet score

|                         | Quartile for FAs % |                   |                   |                   | <i>P</i> -trend |
|-------------------------|--------------------|-------------------|-------------------|-------------------|-----------------|
|                         | Quartile 1         | Quartile 2        | Quartile 3        | Quartile 4        |                 |
| <b>PUFAs %</b>          |                    |                   |                   |                   |                 |
| Events                  | 2,425              | 1,300             | 818               | 563               |                 |
| Model 1+MUFAs %+SFAs %  | 1.00 (Ref.)        | 0.81 (0.74, 0.89) | 0.72 (0.63, 0.84) | 0.62 (0.51, 0.76) | <0.0001         |
| <b>MUFAs %</b>          |                    |                   |                   |                   |                 |
| Events                  | 519                | 832               | 1,291             | 2,464             |                 |
| Model 1+PUFAs %+SFAs %  | 1.00 (Ref.)        | 1.11 (0.99, 1.26) | 1.19 (1.03, 1.37) | 1.43 (1.21, 1.70) | <0.0001         |
| <b>SFAs %</b>           |                    |                   |                   |                   |                 |
| Events                  | 993                | 1,045             | 1,157             | 1,911             |                 |
| Model 1+PUFAs %+MUFAs % | 1.00 (Ref.)        | 1.01 (0.92, 1.11) | 0.96 (0.86, 1.07) | 1.13 (1.01, 1.27) | 0.020           |
| <b>n-3 PUFAs %</b>      |                    |                   |                   |                   |                 |
| Events                  | 1,254              | 1,338             | 1,368             | 1,146             |                 |
| Model 1+MUFAs %+SFAs %  | 1.00 (Ref.)        | 1.10 (1.02, 1.19) | 1.24 (1.15, 1.34) | 1.34 (1.23, 1.47) | <0.0001         |
| <b>DHAs %</b>           |                    |                   |                   |                   |                 |
| Events                  | 1,806              | 1,322             | 1,085             | 893               |                 |
| Model 1+MUFAs %+SFAs %  | 1.00 (Ref.)        | 1.10 (1.02, 1.18) | 1.21 (1.11, 1.32) | 1.36 (1.23, 1.51) | <0.0001         |
| <b>n-6 PUFAs %</b>      |                    |                   |                   |                   |                 |

|                            |             |                   |                   |                   |         |
|----------------------------|-------------|-------------------|-------------------|-------------------|---------|
| Events                     | 2,436       | 1,294             | 785               | 591               |         |
| Model 1+MUFAs %+SFAs %     | 1.00 (Ref.) | 0.77 (0.71, 0.84) | 0.62 (0.56, 0.70) | 0.57 (0.49, 0.66) | <0.0001 |
| <b>LAs %</b>               |             |                   |                   |                   |         |
| Events                     | 2,509       | 1,283             | 786               | 528               |         |
| Model 1+MUFAs %+SFAs %     | 1.00 (Ref.) | 0.79 (0.73, 0.85) | 0.64 (0.58, 0.70) | 0.54 (0.48, 0.62) | <0.0001 |
| <b>PUFAs/MUFAs ratio</b>   |             |                   |                   |                   |         |
| Events                     | 2,482       | 1,301             | 800               | 523               |         |
| Model 1                    | 1.00 (Ref.) | 0.70 (0.66, 0.75) | 0.55 (0.51, 0.60) | 0.44 (0.40, 0.49) | <0.0001 |
| <b>n-6/n-3 PUFAs ratio</b> |             |                   |                   |                   |         |
| Events                     | 1,515       | 1,393             | 1,194             | 1,004             |         |
| Model 1                    | 1.00 (Ref.) | 0.87 (0.81, 0.93) | 0.75 (0.69, 0.81) | 0.65 (0.60, 0.71) | <0.0001 |

Model 1 was adjusted for age (years), sex (male, female), race/ethnicity (White, Asian or Asian British, Black or Black British, Mixed), social deprivation score (in quintiles), BMI (kg/m<sup>2</sup>), diet quality score, physical activity (in quartiles), smoking status (never, former, current), alcohol consumption (never, former, current), use of lipid-lowering medication (yes, no) and aspirin (yes, no), and history of diabetes (yes, no), cardiovascular disease (yes, no) and chronic kidney disease (yes, no) at baseline.
